# Supplementary material
Source: HighWire-hosted journal article supplement (https://qualitysafety.bmj.com/content/26/10/832)

**SUPPLEMENT:**

**eFigure**: Study flow diagram


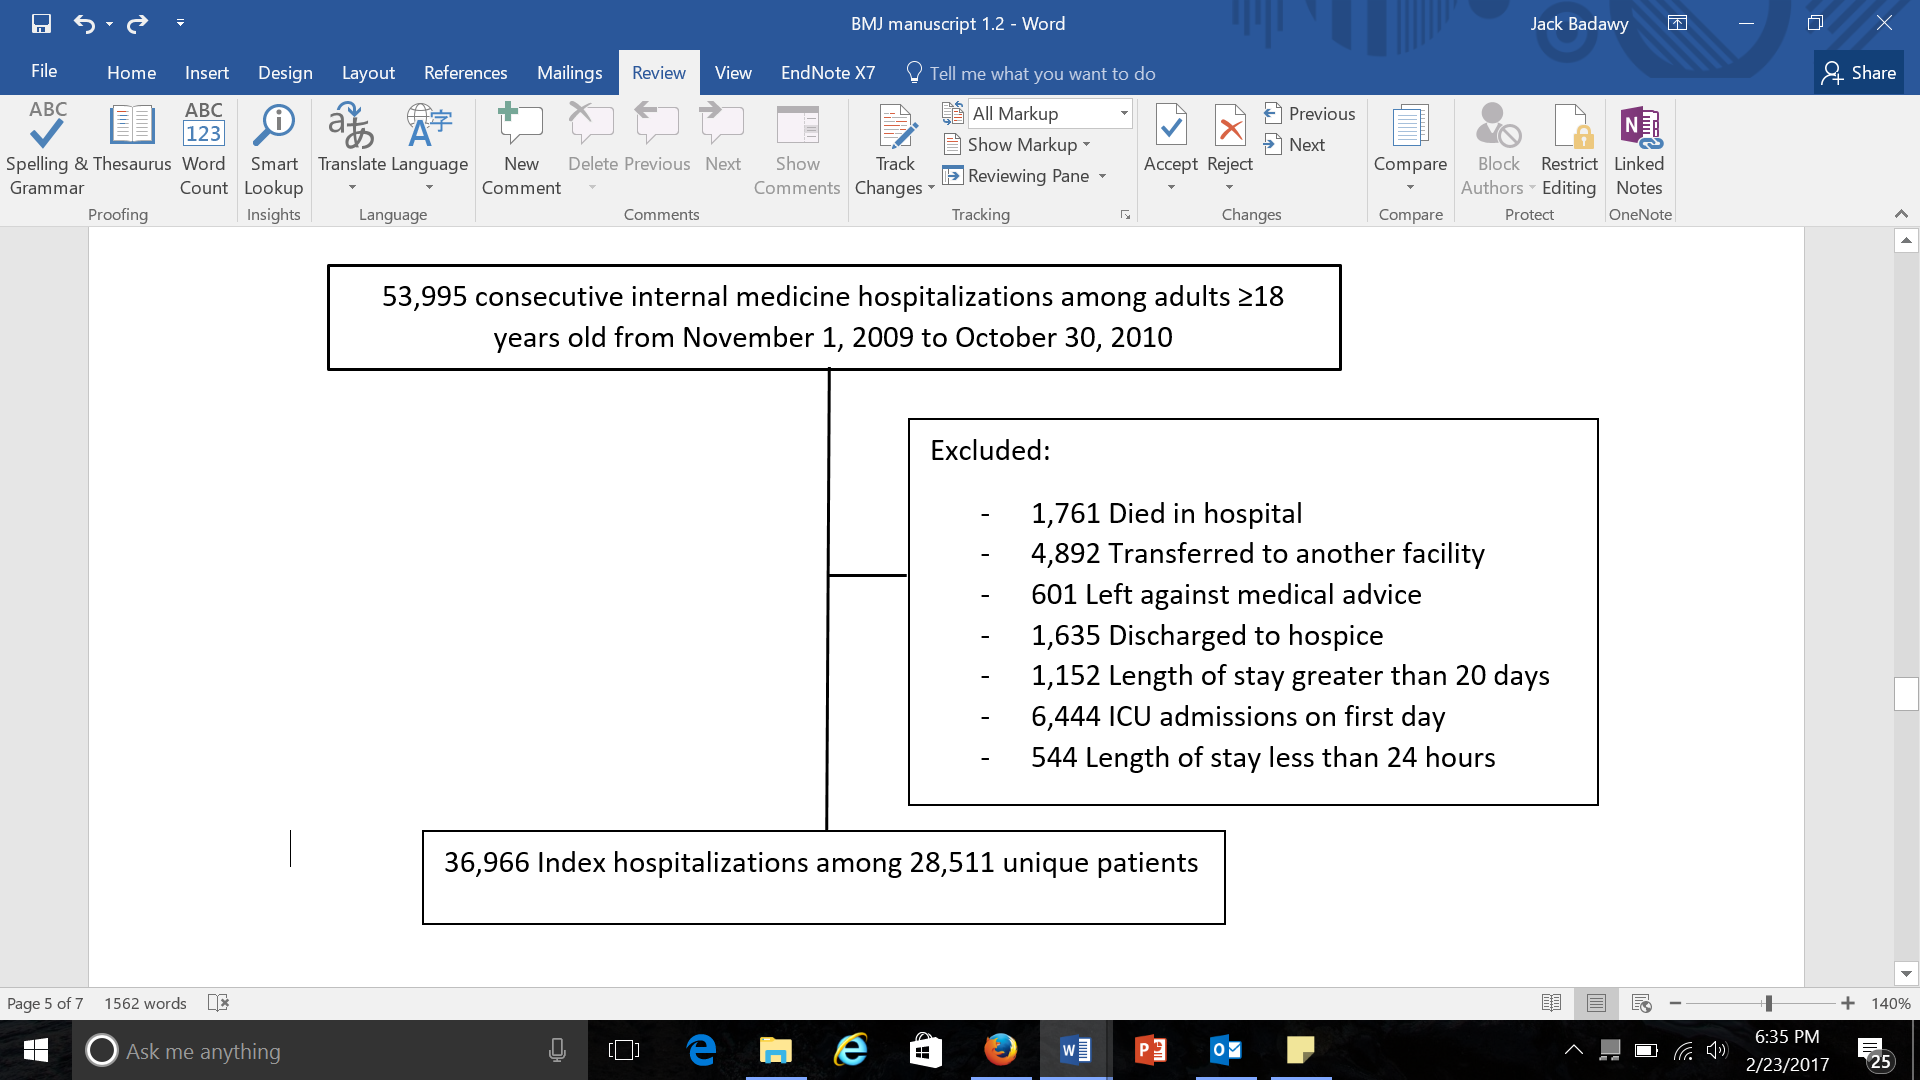

Supplement: inline-supplementary-material-2 [file inline-supplementary-material-2.docx]
